# Supplementary material for: Vaginal Microbiome Composition, Diversity and Dysbiosis: The ORCHiD Study
Source: Research Square preprint supplement (doi:10.21203/rs.3.rs-7428423/v1), 2025-09-11
Supplement: Supplementary file 1 [file 53f68c089f1a991e14b1b1ac.xlsx]

## Sheet: Supplemental File - Microbiome
Topic	baseMean	log2FoldChange	lfcSE	stat	pvalue	padj	reject	df	comparison
Topic_4	275549	1.31279	0.321622	4.08178	8.16495e-05	0.000571547	TRUE	118	Age (continuous)
Topic_6	14985.6	-1.92949	0.718592	-2.6851	0.00829507	0.0580655	FALSE	118	Late vs Early
Topic_2	7568.07	-1.40945	0.576419	-2.44518	0.0159553	0.0853803	FALSE	118	White vs Black
Topic_5	298219	-3.07013	1.34646	-2.28015	0.0243944	0.0853803	FALSE	118	White vs Black
Topic_6	14985.6	0.624486	0.281816	2.21593	0.0286143	0.10015	FALSE	118	Age (continuous)
Topic_5	298219	-1.00859	0.534102	-1.88839	0.0614294	0.143335	FALSE	118	Age (continuous)
Topic_1	158728	-1.48758	0.936394	-1.58863	0.11482	0.267913	FALSE	118	White vs Black
Topic_1	158728	-1.24119	0.947123	-1.31048	0.192577	0.674021	FALSE	118	Late vs Early
Topic_3	43812.9	0.764785	0.910543	0.839922	0.402651	0.697351	FALSE	118	White vs Black
Topic_4	275549	0.490015	0.810802	0.604359	0.546765	0.697351	FALSE	118	White vs Black
Topic_6	14985.6	-0.375901	0.710452	-0.529101	0.597729	0.697351	FALSE	118	White vs Black
Topic_3	43812.9	0.289669	0.361186	0.801993	0.424169	0.742296	FALSE	118	Age (continuous)
Topic_2	7568.07	-0.42748	0.583024	-0.733211	0.464884	0.795175	FALSE	118	Late vs Early
Topic_3	43812.9	0.407516	0.920975	0.442483	0.65895	0.795175	FALSE	118	Late vs Early
Topic_4	275549	-0.634694	0.820091	-0.773931	0.440519	0.795175	FALSE	118	Late vs Early
Topic_7	201138	0.328302	0.798153	0.411327	0.681579	0.795175	FALSE	118	Late vs Early
Topic_1	158728	0.774709	0.921021	0.841142	0.40197	0.870566	FALSE	118	Type II vs Type I/Other
Topic_2	7568.07	-0.588178	0.566956	-1.03743	0.301656	0.870566	FALSE	118	Type II vs Type I/Other
Topic_3	43812.9	-0.518553	0.895594	-0.579005	0.563689	0.870566	FALSE	118	Type II vs Type I/Other
Topic_4	275549	0.180405	0.79749	0.226216	0.821425	0.870566	FALSE	118	Type II vs Type I/Other
Topic_5	298219	-1.61318	1.32435	-1.21809	0.22562	0.870566	FALSE	118	Type II vs Type I/Other
Topic_6	14985.6	-0.114109	0.698788	-0.163295	0.870566	0.870566	FALSE	118	Type II vs Type I/Other
Topic_7	201138	0.34277	0.776156	0.441625	0.659569	0.870566	FALSE	118	Type II vs Type I/Other
Topic_5	298219	0.129694	1.36189	0.0952314	0.924293	0.924293	FALSE	118	Late vs Early
Topic_1	158728	-0.0314404	0.371441	-0.0846445	0.932687	0.932687	FALSE	118	Age (continuous)
Topic_2	7568.07	-0.0783632	0.228649	-0.342722	0.732417	0.932687	FALSE	118	Age (continuous)
Topic_7	201138	-0.0542202	0.313018	-0.173218	0.862777	0.932687	FALSE	118	Age (continuous)
Topic_7	201138	-0.0578658	0.789112	-0.0733303	0.941667	0.941667	FALSE	118	White vs Black

## Sheet: Top Genus Dif Abundance
analysis_key	Race_clean	median_rel_abun_pct	q25_pct	q75_pct	mean_rel_abun_pct	n_samples	n_detected	prevalence_pct	genus	grouping_variable	median_iqr_text	age_cat_clean	Stage_clean	Histology_clean	p_value	p_adj_fdr	significant	sig_level	significance_category	test_method	groups_tested
Anaerococcus_Race_clean	Black	0.398809	0.0667072	4.78476	5.09903	22	19	86.3636	Anaerococcus	Race_clean	0.4% (0.1-4.8%)	NA	NA	NA	0.0677935	0.319164	FALSE	ns	Not significant	Wilcoxon rank-sum test	Black vs White
Anaerococcus_Race_clean	White	3.05895	0.409132	8.30324	5.74062	110	101	91.8182	Anaerococcus	Race_clean	3.1% (0.4-8.3%)	NA	NA	NA	0.0677935	0.319164	FALSE	ns	Not significant	Wilcoxon rank-sum test	Black vs White
Anaerococcus_age_cat_clean	NA	0.394293	0.0479203	2.4129	1.53737	22	18	81.8182	Anaerococcus	age_cat_clean	0.4% (0-2.4%)	<50	NA	NA	0.00210135	0.126081	FALSE	·	Trending (FDR < 0.2)	Wilcoxon rank-sum test	≥50 vs <50
Anaerococcus_age_cat_clean	NA	3.37157	0.409132	8.62146	6.45295	110	102	92.7273	Anaerococcus	age_cat_clean	3.4% (0.4-8.6%)	≥50	NA	NA	0.00210135	0.126081	FALSE	·	Trending (FDR < 0.2)	Wilcoxon rank-sum test	≥50 vs <50
Anaerococcus_Stage_clean	NA	1.97816	0.331472	5.53407	3.82271	41	36	87.8049	Anaerococcus	Stage_clean	2% (0.3-5.5%)	NA	Early	NA	0.495656	0.780983	FALSE	ns	Not significant	Wilcoxon rank-sum test	Late vs Early
Anaerococcus_Stage_clean	NA	2.99174	0.219153	9.25363	6.44962	91	84	92.3077	Anaerococcus	Stage_clean	3% (0.2-9.3%)	NA	Late	NA	0.495656	0.780983	FALSE	ns	Not significant	Wilcoxon rank-sum test	Late vs Early
Anaerococcus_Histology_clean	NA	0.9268	0.158118	5.15846	3.71507	52	46	88.4615	Anaerococcus	Histology_clean	0.9% (0.2-5.2%)	NA	NA	Type I epithelial / Other	0.0546332	0.319164	FALSE	ns	Not significant	Wilcoxon rank-sum test	Type II epithelial vs Type I epithelial / Other
Anaerococcus_Histology_clean	NA	3.2806	0.430455	8.56617	6.88079	80	74	92.5	Anaerococcus	Histology_clean	3.3% (0.4-8.6%)	NA	NA	Type II epithelial	0.0546332	0.319164	FALSE	ns	Not significant	Wilcoxon rank-sum test	Type II epithelial vs Type I epithelial / Other
Atopobium_Race_clean	Black	0.0393473	0	0.488298	6.03808	22	14	63.6364	Atopobium	Race_clean	0% (0-0.5%)	NA	NA	NA	0.270024	0.540047	FALSE	ns	Not significant	Wilcoxon rank-sum test	White vs Black
Atopobium_Race_clean	White	0.0128974	0	0.152656	1.86174	110	57	51.8182	Atopobium	Race_clean	0% (0-0.2%)	NA	NA	NA	0.270024	0.540047	FALSE	ns	Not significant	Wilcoxon rank-sum test	White vs Black
Atopobium_age_cat_clean	NA	0	0	0.0835534	2.00681	22	9	40.9091	Atopobium	age_cat_clean	0% (0-0.1%)	<50	NA	NA	0.26724	0.540047	FALSE	ns	Not significant	Wilcoxon rank-sum test	≥50 vs <50
Atopobium_age_cat_clean	NA	0.0222568	0	0.25601	2.66799	110	62	56.3636	Atopobium	age_cat_clean	0% (0-0.3%)	≥50	NA	NA	0.26724	0.540047	FALSE	ns	Not significant	Wilcoxon rank-sum test	≥50 vs <50
Atopobium_Stage_clean	NA	0	0	0.0693879	0.808078	41	17	41.4634	Atopobium	Stage_clean	0% (0-0.1%)	NA	Early	NA	0.100593	0.324809	FALSE	ns	Not significant	Wilcoxon rank-sum test	Late vs Early
Atopobium_Stage_clean	NA	0.0234622	0	0.286708	3.34613	91	54	59.3407	Atopobium	Stage_clean	0% (0-0.3%)	NA	Late	NA	0.100593	0.324809	FALSE	ns	Not significant	Wilcoxon rank-sum test	Late vs Early
Atopobium_Histology_clean	NA	0.00207546	0	0.114889	1.07456	52	26	50	Atopobium	Histology_clean	0% (0-0.1%)	NA	NA	Type I epithelial / Other	0.39472	0.696564	FALSE	ns	Not significant	Wilcoxon rank-sum test	Type II epithelial vs Type I epithelial / Other
Atopobium_Histology_clean	NA	0.0225413	0	0.208268	3.5219	80	45	56.25	Atopobium	Histology_clean	0% (0-0.2%)	NA	NA	Type II epithelial	0.39472	0.696564	FALSE	ns	Not significant	Wilcoxon rank-sum test	Type II epithelial vs Type I epithelial / Other
Campylobacter_Race_clean	Black	0.254005	0.0480888	1.78799	1.61111	22	17	77.2727	Campylobacter	Race_clean	0.3% (0-1.8%)	NA	NA	NA	0.570157	0.81451	FALSE	ns	Not significant	Wilcoxon rank-sum test	White vs Black
Campylobacter_Race_clean	White	0.505168	0.0248733	3.69453	2.59174	110	86	78.1818	Campylobacter	Race_clean	0.5% (0-3.7%)	NA	NA	NA	0.570157	0.81451	FALSE	ns	Not significant	Wilcoxon rank-sum test	White vs Black
Campylobacter_age_cat_clean	NA	0.0825325	0.00827615	0.921259	0.857792	22	16	72.7273	Campylobacter	age_cat_clean	0.1% (0-0.9%)	<50	NA	NA	0.0775893	0.319164	FALSE	ns	Not significant	Wilcoxon rank-sum test	≥50 vs <50
Campylobacter_age_cat_clean	NA	0.641007	0.02727	3.9654	2.74241	110	87	79.0909	Campylobacter	age_cat_clean	0.6% (0-4%)	≥50	NA	NA	0.0775893	0.319164	FALSE	ns	Not significant	Wilcoxon rank-sum test	≥50 vs <50
Campylobacter_Stage_clean	NA	0.502214	0.0331046	4.82399	2.83637	41	31	75.6098	Campylobacter	Stage_clean	0.5% (0-4.8%)	NA	Early	NA	0.491961	0.780983	FALSE	ns	Not significant	Wilcoxon rank-sum test	Late vs Early
Campylobacter_Stage_clean	NA	0.39151	0.0249669	2.83517	2.24445	91	72	79.1209	Campylobacter	Stage_clean	0.4% (0-2.8%)	NA	Late	NA	0.491961	0.780983	FALSE	ns	Not significant	Wilcoxon rank-sum test	Late vs Early
Campylobacter_Histology_clean	NA	0.240421	0.034544	2.5199	2.08193	52	41	78.8462	Campylobacter	Histology_clean	0.2% (0-2.5%)	NA	NA	Type I epithelial / Other	0.438417	0.751572	FALSE	ns	Not significant	Wilcoxon rank-sum test	Type II epithelial vs Type I epithelial / Other
Campylobacter_Histology_clean	NA	0.880416	0.0125742	3.87663	2.65345	80	62	77.5	Campylobacter	Histology_clean	0.9% (0-3.9%)	NA	NA	Type II epithelial	0.438417	0.751572	FALSE	ns	Not significant	Wilcoxon rank-sum test	Type II epithelial vs Type I epithelial / Other
Corynebacterium_Race_clean	Black	0.3067	0.0586722	1.77238	2.59467	22	19	86.3636	Corynebacterium	Race_clean	0.3% (0.1-1.8%)	NA	NA	NA	0.0664847	0.319164	FALSE	ns	Not significant	Wilcoxon rank-sum test	White vs Black
Corynebacterium_Race_clean	White	0.95077	0.219439	6.38746	5.33284	110	104	94.5455	Corynebacterium	Race_clean	1% (0.2-6.4%)	NA	NA	NA	0.0664847	0.319164	FALSE	ns	Not significant	Wilcoxon rank-sum test	White vs Black
Corynebacterium_age_cat_clean	NA	0.263165	0.0417428	3.29737	4.59214	22	18	81.8182	Corynebacterium	age_cat_clean	0.3% (0-3.3%)	<50	NA	NA	0.127587	0.340919	FALSE	ns	Not significant	Wilcoxon rank-sum test	≥50 vs <50
Corynebacterium_age_cat_clean	NA	0.969739	0.223768	5.2	4.93334	110	105	95.4545	Corynebacterium	age_cat_clean	1% (0.2-5.2%)	≥50	NA	NA	0.127587	0.340919	FALSE	ns	Not significant	Wilcoxon rank-sum test	≥50 vs <50
Corynebacterium_Stage_clean	NA	1.40896	0.0900592	6.53275	6.27794	41	38	92.6829	Corynebacterium	Stage_clean	1.4% (0.1-6.5%)	NA	Early	NA	0.591889	0.820093	FALSE	ns	Not significant	Wilcoxon rank-sum test	Early vs Late
Corynebacterium_Stage_clean	NA	0.860458	0.180033	4.1695	4.24504	91	85	93.4066	Corynebacterium	Stage_clean	0.9% (0.2-4.2%)	NA	Late	NA	0.591889	0.820093	FALSE	ns	Not significant	Wilcoxon rank-sum test	Early vs Late
Corynebacterium_Histology_clean	NA	0.977895	0.199132	3.3682	4.32623	52	50	96.1538	Corynebacterium	Histology_clean	1% (0.2-3.4%)	NA	NA	Type I epithelial / Other	0.979562	0.996165	FALSE	ns	Not significant	Wilcoxon rank-sum test	Type I epithelial / Other vs Type II epithelial
Corynebacterium_Histology_clean	NA	0.927885	0.149131	6.59299	5.23413	80	73	91.25	Corynebacterium	Histology_clean	0.9% (0.1-6.6%)	NA	NA	Type II epithelial	0.979562	0.996165	FALSE	ns	Not significant	Wilcoxon rank-sum test	Type I epithelial / Other vs Type II epithelial
Dialister_Race_clean	Black	0.468078	0.0372839	3.1815	1.98135	22	17	77.2727	Dialister	Race_clean	0.5% (0-3.2%)	NA	NA	NA	0.970687	0.996165	FALSE	ns	Not significant	Wilcoxon rank-sum test	White vs Black
Dialister_Race_clean	White	0.658794	0.0531721	2.20628	1.59359	110	91	82.7273	Dialister	Race_clean	0.7% (0.1-2.2%)	NA	NA	NA	0.970687	0.996165	FALSE	ns	Not significant	Wilcoxon rank-sum test	White vs Black
Dialister_age_cat_clean	NA	0.464839	0.0409987	1.78268	1.18602	22	18	81.8182	Dialister	age_cat_clean	0.5% (0-1.8%)	<50	NA	NA	0.376169	0.693349	FALSE	ns	Not significant	Wilcoxon rank-sum test	≥50 vs <50
Dialister_age_cat_clean	NA	0.799554	0.0531721	2.88472	1.75266	110	90	81.8182	Dialister	age_cat_clean	0.8% (0.1-2.9%)	≥50	NA	NA	0.376169	0.693349	FALSE	ns	Not significant	Wilcoxon rank-sum test	≥50 vs <50
Dialister_Stage_clean	NA	0.453829	0.122017	2.22858	1.69599	41	33	80.4878	Dialister	Stage_clean	0.5% (0.1-2.2%)	NA	Early	NA	0.72249	0.834529	FALSE	ns	Not significant	Wilcoxon rank-sum test	Late vs Early
Dialister_Stage_clean	NA	0.900454	0.0435802	2.59711	1.6412	91	75	82.4176	Dialister	Stage_clean	0.9% (0-2.6%)	NA	Late	NA	0.72249	0.834529	FALSE	ns	Not significant	Wilcoxon rank-sum test	Late vs Early
Dialister_Histology_clean	NA	0.429352	0.0067714	1.65529	1.38854	52	39	75	Dialister	Histology_clean	0.4% (0-1.7%)	NA	NA	Type I epithelial / Other	0.0935527	0.324809	FALSE	ns	Not significant	Wilcoxon rank-sum test	Type II epithelial vs Type I epithelial / Other
Dialister_Histology_clean	NA	0.946094	0.13985	2.90333	1.83351	80	69	86.25	Dialister	Histology_clean	0.9% (0.1-2.9%)	NA	NA	Type II epithelial	0.0935527	0.324809	FALSE	ns	Not significant	Wilcoxon rank-sum test	Type II epithelial vs Type I epithelial / Other
Escherichia-Shigella_Race_clean	Black	0	0	0.0478927	0.807987	22	6	27.2727	Escherichia-Shigella	Race_clean	0% (0-0%)	NA	NA	NA	0.633699	0.834529	FALSE	ns	Not significant	Wilcoxon rank-sum test	White vs Black
Escherichia-Shigella_Race_clean	White	0	0	0.0406816	4.32624	110	36	32.7273	Escherichia-Shigella	Race_clean	0% (0-0%)	NA	NA	NA	0.633699	0.834529	FALSE	ns	Not significant	Wilcoxon rank-sum test	White vs Black
Escherichia-Shigella_age_cat_clean	NA	0	0	0.0924113	5.09781	22	7	31.8182	Escherichia-Shigella	age_cat_clean	0% (0-0.1%)	<50	NA	NA	0.905903	0.953582	FALSE	ns	Not significant	Wilcoxon rank-sum test	<50 vs ≥50
Escherichia-Shigella_age_cat_clean	NA	0	0	0.0404652	3.46828	110	35	31.8182	Escherichia-Shigella	age_cat_clean	0% (0-0%)	≥50	NA	NA	0.905903	0.953582	FALSE	ns	Not significant	Wilcoxon rank-sum test	<50 vs ≥50
Escherichia-Shigella_Stage_clean	NA	0	0	0.0417602	2.0284	41	14	34.1463	Escherichia-Shigella	Stage_clean	0% (0-0%)	NA	Early	NA	0.718862	0.834529	FALSE	ns	Not significant	Wilcoxon rank-sum test	Late vs Early
Escherichia-Shigella_Stage_clean	NA	0	0	0.0474521	4.51097	91	28	30.7692	Escherichia-Shigella	Stage_clean	0% (0-0%)	NA	Late	NA	0.718862	0.834529	FALSE	ns	Not significant	Wilcoxon rank-sum test	Late vs Early
Escherichia-Shigella_Histology_clean	NA	0	0	0.103524	5.0893	52	19	36.5385	Escherichia-Shigella	Histology_clean	0% (0-0.1%)	NA	NA	Type I epithelial / Other	0.262138	0.540047	FALSE	ns	Not significant	Wilcoxon rank-sum test	Type I epithelial / Other vs Type II epithelial
Escherichia-Shigella_Histology_clean	NA	0	0	0.0169943	2.86273	80	23	28.75	Escherichia-Shigella	Histology_clean	0% (0-0%)	NA	NA	Type II epithelial	0.262138	0.540047	FALSE	ns	Not significant	Wilcoxon rank-sum test	Type I epithelial / Other vs Type II epithelial
Ezakiella_Race_clean	Black	0.0147485	0	0.583063	0.431104	22	12	54.5455	Ezakiella	Race_clean	0% (0-0.6%)	NA	NA	NA	0.040688	0.271254	FALSE	ns	Not significant	Wilcoxon rank-sum test	White vs Black
Ezakiella_Race_clean	White	0.179143	0	1.96117	2.31203	110	80	72.7273	Ezakiella	Race_clean	0.2% (0-2%)	NA	NA	NA	0.040688	0.271254	FALSE	ns	Not significant	Wilcoxon rank-sum test	White vs Black
Ezakiella_age_cat_clean	NA	0.0118069	0	0.15954	1.34559	22	15	68.1818	Ezakiella	age_cat_clean	0% (0-0.2%)	<50	NA	NA	0.075517	0.319164	FALSE	ns	Not significant	Wilcoxon rank-sum test	<50 vs ≥50
Ezakiella_age_cat_clean	NA	0.207269	0	1.75318	2.12913	110	77	70	Ezakiella	age_cat_clean	0.2% (0-1.8%)	≥50	NA	NA	0.075517	0.319164	FALSE	ns	Not significant	Wilcoxon rank-sum test	<50 vs ≥50
Ezakiella_Stage_clean	NA	0.162999	0	1.38862	2.0761	41	27	65.8537	Ezakiella	Stage_clean	0.2% (0-1.4%)	NA	Early	NA	0.723258	0.834529	FALSE	ns	Not significant	Wilcoxon rank-sum test	Early vs Late
Ezakiella_Stage_clean	NA	0.1294	0	1.43936	1.9636	91	65	71.4286	Ezakiella	Stage_clean	0.1% (0-1.4%)	NA	Late	NA	0.723258	0.834529	FALSE	ns	Not significant	Wilcoxon rank-sum test	Early vs Late
Ezakiella_Histology_clean	NA	0.0525384	0	1.2094	1.90286	52	36	69.2308	Ezakiella	Histology_clean	0.1% (0-1.2%)	NA	NA	Type I epithelial / Other	0.569252	0.81451	FALSE	ns	Not significant	Wilcoxon rank-sum test	Type I epithelial / Other vs Type II epithelial
Ezakiella_Histology_clean	NA	0.14923	0	1.64573	2.06074	80	56	70	Ezakiella	Histology_clean	0.1% (0-1.6%)	NA	NA	Type II epithelial	0.569252	0.81451	FALSE	ns	Not significant	Wilcoxon rank-sum test	Type I epithelial / Other vs Type II epithelial
Fenollaria_Race_clean	Black	0.0285328	0	1.35206	1.80348	22	12	54.5455	Fenollaria	Race_clean	0% (0-1.4%)	NA	NA	NA	0.88972	0.953272	FALSE	ns	Not significant	Wilcoxon rank-sum test	Black vs White
Fenollaria_Race_clean	White	0.0172079	0	0.687166	1.42356	110	58	52.7273	Fenollaria	Race_clean	0% (0-0.7%)	NA	NA	NA	0.88972	0.953272	FALSE	ns	Not significant	Wilcoxon rank-sum test	Black vs White
Fenollaria_age_cat_clean	NA	0.00777817	0	0.585809	1.49791	22	11	50	Fenollaria	age_cat_clean	0% (0-0.6%)	<50	NA	NA	0.601402	0.820093	FALSE	ns	Not significant	Wilcoxon rank-sum test	≥50 vs <50
Fenollaria_age_cat_clean	NA	0.0281679	0	0.878216	1.48467	110	59	53.6364	Fenollaria	age_cat_clean	0% (0-0.9%)	≥50	NA	NA	0.601402	0.820093	FALSE	ns	Not significant	Wilcoxon rank-sum test	≥50 vs <50
Fenollaria_Stage_clean	NA	0	0	1.4941	1.42367	41	19	46.3415	Fenollaria	Stage_clean	0% (0-1.5%)	NA	Early	NA	0.670175	0.834529	FALSE	ns	Not significant	Wilcoxon rank-sum test	Late vs Early
Fenollaria_Stage_clean	NA	0.0334855	0	0.619381	1.51536	91	51	56.044	Fenollaria	Stage_clean	0% (0-0.6%)	NA	Late	NA	0.670175	0.834529	FALSE	ns	Not significant	Wilcoxon rank-sum test	Late vs Early
Fenollaria_Histology_clean	NA	0	0	0.184162	1.20951	52	24	46.1538	Fenollaria	Histology_clean	0% (0-0.2%)	NA	NA	Type I epithelial / Other	0.10827	0.324809	FALSE	ns	Not significant	Wilcoxon rank-sum test	Type II epithelial vs Type I epithelial / Other
Fenollaria_Histology_clean	NA	0.0468494	0	1.49034	1.66717	80	46	57.5	Fenollaria	Histology_clean	0% (0-1.5%)	NA	NA	Type II epithelial	0.10827	0.324809	FALSE	ns	Not significant	Wilcoxon rank-sum test	Type II epithelial vs Type I epithelial / Other
Finegoldia_Race_clean	Black	1.62752	0.285636	4.57038	4.40873	22	20	90.9091	Finegoldia	Race_clean	1.6% (0.3-4.6%)	NA	NA	NA	0.507639	0.780983	FALSE	ns	Not significant	Wilcoxon rank-sum test	White vs Black
Finegoldia_Race_clean	White	2.16645	0.507549	7.57914	5.27375	110	107	97.2727	Finegoldia	Race_clean	2.2% (0.5-7.6%)	NA	NA	NA	0.507639	0.780983	FALSE	ns	Not significant	Wilcoxon rank-sum test	White vs Black
Finegoldia_age_cat_clean	NA	1.12172	0.135543	4.27311	4.75234	22	20	90.9091	Finegoldia	age_cat_clean	1.1% (0.1-4.3%)	<50	NA	NA	0.1557	0.38925	FALSE	ns	Not significant	Wilcoxon rank-sum test	<50 vs ≥50
Finegoldia_age_cat_clean	NA	2.2782	0.583333	7.57914	5.20503	110	107	97.2727	Finegoldia	age_cat_clean	2.3% (0.6-7.6%)	≥50	NA	NA	0.1557	0.38925	FALSE	ns	Not significant	Wilcoxon rank-sum test	<50 vs ≥50
Finegoldia_Stage_clean	NA	1.65899	0.500516	4.39262	4.48978	41	40	97.561	Finegoldia	Stage_clean	1.7% (0.5-4.4%)	NA	Early	NA	0.545259	0.81451	FALSE	ns	Not significant	Wilcoxon rank-sum test	Late vs Early
Finegoldia_Stage_clean	NA	2.33804	0.490805	7.73647	5.41784	91	87	95.6044	Finegoldia	Stage_clean	2.3% (0.5-7.7%)	NA	Late	NA	0.545259	0.81451	FALSE	ns	Not significant	Wilcoxon rank-sum test	Late vs Early
Finegoldia_Histology_clean	NA	1.54941	0.403637	4.23476	3.62883	52	50	96.1538	Finegoldia	Histology_clean	1.5% (0.4-4.2%)	NA	NA	Type I epithelial / Other	0.128362	0.340919	FALSE	ns	Not significant	Wilcoxon rank-sum test	Type II epithelial vs Type I epithelial / Other
Finegoldia_Histology_clean	NA	2.72769	0.523717	9.17779	6.10507	80	77	96.25	Finegoldia	Histology_clean	2.7% (0.5-9.2%)	NA	NA	Type II epithelial	0.128362	0.340919	FALSE	ns	Not significant	Wilcoxon rank-sum test	Type II epithelial vs Type I epithelial / Other
Lactobacillus_Race_clean	Black	6.26245	0	72.1888	34.3504	22	15	68.1818	Lactobacillus	Race_clean	6.3% (0-72.2%)	NA	NA	NA	0.0399408	0.271254	FALSE	ns	Not significant	Wilcoxon rank-sum test	Black vs White
Lactobacillus_Race_clean	White	0	0	25.4071	21.3854	110	48	43.6364	Lactobacillus	Race_clean	0% (0-25.4%)	NA	NA	NA	0.0399408	0.271254	FALSE	ns	Not significant	Wilcoxon rank-sum test	Black vs White
Lactobacillus_age_cat_clean	NA	0.491727	0	88.3236	36.4711	22	13	59.0909	Lactobacillus	age_cat_clean	0.5% (0-88.3%)	<50	NA	NA	0.105429	0.324809	FALSE	ns	Not significant	Wilcoxon rank-sum test	≥50 vs <50
Lactobacillus_age_cat_clean	NA	0	0	35.7664	20.9613	110	50	45.4545	Lactobacillus	age_cat_clean	0% (0-35.8%)	≥50	NA	NA	0.105429	0.324809	FALSE	ns	Not significant	Wilcoxon rank-sum test	≥50 vs <50
Lactobacillus_Stage_clean	NA	0.0238857	0	75.2501	26.4843	41	23	56.0976	Lactobacillus	Stage_clean	0% (0-75.3%)	NA	Early	NA	0.240462	0.540047	FALSE	ns	Not significant	Wilcoxon rank-sum test	Late vs Early
Lactobacillus_Stage_clean	NA	0	0	42.4649	22.2225	91	40	43.956	Lactobacillus	Stage_clean	0% (0-42.5%)	NA	Late	NA	0.240462	0.540047	FALSE	ns	Not significant	Wilcoxon rank-sum test	Late vs Early
Lactobacillus_Histology_clean	NA	0.167854	0	80.6633	33.8395	52	29	55.7692	Lactobacillus	Histology_clean	0.2% (0-80.7%)	NA	NA	Type I epithelial / Other	0.0366159	0.271254	FALSE	ns	Not significant	Wilcoxon rank-sum test	Type II epithelial vs Type I epithelial / Other
Lactobacillus_Histology_clean	NA	0	0	9.88423	16.8557	80	34	42.5	Lactobacillus	Histology_clean	0% (0-9.9%)	NA	NA	Type II epithelial	0.0366159	0.271254	FALSE	ns	Not significant	Wilcoxon rank-sum test	Type II epithelial vs Type I epithelial / Other
Peptoniphilus_Race_clean	Black	1.36608	0.390336	5.09105	4.01257	22	20	90.9091	Peptoniphilus	Race_clean	1.4% (0.4-5.1%)	NA	NA	NA	0.093704	0.324809	FALSE	ns	Not significant	Wilcoxon rank-sum test	White vs Black
Peptoniphilus_Race_clean	White	4.73394	0.679842	9.7091	6.36531	110	106	96.3636	Peptoniphilus	Race_clean	4.7% (0.7-9.7%)	NA	NA	NA	0.093704	0.324809	FALSE	ns	Not significant	Wilcoxon rank-sum test	White vs Black
Peptoniphilus_age_cat_clean	NA	0.832281	0.164427	3.98516	2.7667	22	19	86.3636	Peptoniphilus	age_cat_clean	0.8% (0.2-4%)	<50	NA	NA	0.00599916	0.179975	FALSE	·	Trending (FDR < 0.2)	Wilcoxon rank-sum test	≥50 vs <50
Peptoniphilus_age_cat_clean	NA	5.10554	0.641426	10.0294	6.61449	110	107	97.2727	Peptoniphilus	age_cat_clean	5.1% (0.6-10%)	≥50	NA	NA	0.00599916	0.179975	FALSE	·	Trending (FDR < 0.2)	Wilcoxon rank-sum test	≥50 vs <50
Peptoniphilus_Stage_clean	NA	3.4833	0.347132	8.59636	4.93432	41	38	92.6829	Peptoniphilus	Stage_clean	3.5% (0.3-8.6%)	NA	Early	NA	0.321715	0.622675	FALSE	ns	Not significant	Wilcoxon rank-sum test	Late vs Early
Peptoniphilus_Stage_clean	NA	4.57416	0.638646	9.90106	6.44125	91	88	96.7033	Peptoniphilus	Stage_clean	4.6% (0.6-9.9%)	NA	Late	NA	0.321715	0.622675	FALSE	ns	Not significant	Wilcoxon rank-sum test	Late vs Early
Peptoniphilus_Histology_clean	NA	2.22906	0.150275	6.43532	4.59916	52	48	92.3077	Peptoniphilus	Histology_clean	2.2% (0.2-6.4%)	NA	NA	Type I epithelial / Other	0.0228993	0.271254	FALSE	ns	Not significant	Wilcoxon rank-sum test	Type II epithelial vs Type I epithelial / Other
Peptoniphilus_Histology_clean	NA	5.10554	0.898299	10.1135	6.86631	80	78	97.5	Peptoniphilus	Histology_clean	5.1% (0.9-10.1%)	NA	NA	Type II epithelial	0.0228993	0.271254	FALSE	ns	Not significant	Wilcoxon rank-sum test	Type II epithelial vs Type I epithelial / Other
Porphyromonas_Race_clean	Black	0	0	0.153932	0.75994	22	10	45.4545	Porphyromonas	Race_clean	0% (0-0.2%)	NA	NA	NA	0.0312133	0.271254	FALSE	ns	Not significant	Wilcoxon rank-sum test	White vs Black
Porphyromonas_Race_clean	White	0.140409	0	1.20918	1.52679	110	81	73.6364	Porphyromonas	Race_clean	0.1% (0-1.2%)	NA	NA	NA	0.0312133	0.271254	FALSE	ns	Not significant	Wilcoxon rank-sum test	White vs Black
Porphyromonas_age_cat_clean	NA	0.00913537	0	0.133843	0.58967	22	12	54.5455	Porphyromonas	age_cat_clean	0% (0-0.1%)	<50	NA	NA	0.0358568	0.271254	FALSE	ns	Not significant	Wilcoxon rank-sum test	≥50 vs <50
Porphyromonas_age_cat_clean	NA	0.146257	0	1.38945	1.56084	110	79	71.8182	Porphyromonas	age_cat_clean	0.1% (0-1.4%)	≥50	NA	NA	0.0358568	0.271254	FALSE	ns	Not significant	Wilcoxon rank-sum test	≥50 vs <50
Porphyromonas_Stage_clean	NA	0.0660808	0	1.40525	1.54752	41	26	63.4146	Porphyromonas	Stage_clean	0.1% (0-1.4%)	NA	Early	NA	1	1	FALSE	ns	Not significant	Wilcoxon rank-sum test	Early vs Late
Porphyromonas_Stage_clean	NA	0.0849843	0	1.04584	1.33205	91	65	71.4286	Porphyromonas	Stage_clean	0.1% (0-1%)	NA	Late	NA	1	1	FALSE	ns	Not significant	Wilcoxon rank-sum test	Early vs Late
Porphyromonas_Histology_clean	NA	0.0363795	0	0.67379	1.42159	52	31	59.6154	Porphyromonas	Histology_clean	0% (0-0.7%)	NA	NA	Type I epithelial / Other	0.079791	0.319164	FALSE	ns	Not significant	Wilcoxon rank-sum test	Type I epithelial / Other vs Type II epithelial
Porphyromonas_Histology_clean	NA	0.169358	0.00407268	1.45898	1.38428	80	60	75	Porphyromonas	Histology_clean	0.2% (0-1.5%)	NA	NA	Type II epithelial	0.079791	0.319164	FALSE	ns	Not significant	Wilcoxon rank-sum test	Type I epithelial / Other vs Type II epithelial
Prevotella_Race_clean	Black	5.10464	0.492007	15.9201	11.4119	22	19	86.3636	Prevotella	Race_clean	5.1% (0.5-15.9%)	NA	NA	NA	0.755466	0.855244	FALSE	ns	Not significant	Wilcoxon rank-sum test	White vs Black
Prevotella_Race_clean	White	4.51536	0.652255	23.7052	12.4381	110	105	95.4545	Prevotella	Race_clean	4.5% (0.7-23.7%)	NA	NA	NA	0.755466	0.855244	FALSE	ns	Not significant	Wilcoxon rank-sum test	White vs Black
Prevotella_age_cat_clean	NA	4.24981	0.505126	24.8818	13.9538	22	20	90.9091	Prevotella	age_cat_clean	4.2% (0.5-24.9%)	<50	NA	NA	0.88589	0.953272	FALSE	ns	Not significant	Wilcoxon rank-sum test	<50 vs ≥50
Prevotella_age_cat_clean	NA	5.04337	0.668606	19.7807	11.9297	110	104	94.5455	Prevotella	age_cat_clean	5% (0.7-19.8%)	≥50	NA	NA	0.88589	0.953272	FALSE	ns	Not significant	Wilcoxon rank-sum test	<50 vs ≥50
Prevotella_Stage_clean	NA	3.9081	0.410766	19.9332	10.4128	41	37	90.2439	Prevotella	Stage_clean	3.9% (0.4-19.9%)	NA	Early	NA	0.381342	0.693349	FALSE	ns	Not significant	Wilcoxon rank-sum test	Late vs Early
Prevotella_Stage_clean	NA	5.82983	0.654192	23.6694	13.1025	91	87	95.6044	Prevotella	Stage_clean	5.8% (0.7-23.7%)	NA	Late	NA	0.381342	0.693349	FALSE	ns	Not significant	Wilcoxon rank-sum test	Late vs Early
Prevotella_Histology_clean	NA	3.28686	0.443685	14.3975	9.29887	52	48	92.3077	Prevotella	Histology_clean	3.3% (0.4-14.4%)	NA	NA	Type I epithelial / Other	0.130686	0.340919	FALSE	ns	Not significant	Wilcoxon rank-sum test	Type II epithelial vs Type I epithelial / Other
Prevotella_Histology_clean	NA	6.48871	0.689691	24.7659	14.1964	80	76	95	Prevotella	Histology_clean	6.5% (0.7-24.8%)	NA	NA	Type II epithelial	0.130686	0.340919	FALSE	ns	Not significant	Wilcoxon rank-sum test	Type II epithelial vs Type I epithelial / Other
Pseudomonas_Race_clean	Black	0	0	0	0.0248113	22	3	13.6364	Pseudomonas	Race_clean	0% (0-0%)	NA	NA	NA	0.702247	0.834529	FALSE	ns	Not significant	Wilcoxon rank-sum test	White vs Black
Pseudomonas_Race_clean	White	0	0	0	1.96576	110	12	10.9091	Pseudomonas	Race_clean	0% (0-0%)	NA	NA	NA	0.702247	0.834529	FALSE	ns	Not significant	Wilcoxon rank-sum test	White vs Black
Pseudomonas_age_cat_clean	NA	0	0	0	0.170583	22	2	9.09091	Pseudomonas	age_cat_clean	0% (0-0%)	<50	NA	NA	0.777513	0.863904	FALSE	ns	Not significant	Wilcoxon rank-sum test	≥50 vs <50
Pseudomonas_age_cat_clean	NA	0	0	0	1.9366	110	13	11.8182	Pseudomonas	age_cat_clean	0% (0-0%)	≥50	NA	NA	0.777513	0.863904	FALSE	ns	Not significant	Wilcoxon rank-sum test	≥50 vs <50
Pseudomonas_Stage_clean	NA	0	0	0	3.11403	41	8	19.5122	Pseudomonas	Stage_clean	0% (0-0%)	NA	Early	NA	0.0367751	0.271254	FALSE	ns	Not significant	Wilcoxon rank-sum test	Late vs Early
Pseudomonas_Stage_clean	NA	0	0	0	0.979163	91	7	7.69231	Pseudomonas	Stage_clean	0% (0-0%)	NA	Late	NA	0.0367751	0.271254	FALSE	ns	Not significant	Wilcoxon rank-sum test	Late vs Early
Pseudomonas_Histology_clean	NA	0	0	0	2.45436	52	7	13.4615	Pseudomonas	Histology_clean	0% (0-0%)	NA	NA	Type I epithelial / Other	0.4596	0.766001	FALSE	ns	Not significant	Wilcoxon rank-sum test	Type II epithelial vs Type I epithelial / Other
Pseudomonas_Histology_clean	NA	0	0	0	1.11441	80	8	10	Pseudomonas	Histology_clean	0% (0-0%)	NA	NA	Type II epithelial	0.4596	0.766001	FALSE	ns	Not significant	Wilcoxon rank-sum test	Type II epithelial vs Type I epithelial / Other
Streptococcus_Race_clean	Black	0.101619	0	6.74368	7.02146	22	14	63.6364	Streptococcus	Race_clean	0.1% (0-6.7%)	NA	NA	NA	0.264025	0.540047	FALSE	ns	Not significant	Wilcoxon rank-sum test	White vs Black
Streptococcus_Race_clean	White	1.12828	0.0820558	5.78237	7.35879	110	96	87.2727	Streptococcus	Race_clean	1.1% (0.1-5.8%)	NA	NA	NA	0.264025	0.540047	FALSE	ns	Not significant	Wilcoxon rank-sum test	White vs Black
Streptococcus_age_cat_clean	NA	0.765188	0.0358309	3.65185	7.30138	22	18	81.8182	Streptococcus	age_cat_clean	0.8% (0-3.7%)	<50	NA	NA	0.693027	0.834529	FALSE	ns	Not significant	Wilcoxon rank-sum test	≥50 vs <50
Streptococcus_age_cat_clean	NA	1.08161	0.0573064	6.34637	7.30281	110	92	83.6364	Streptococcus	age_cat_clean	1.1% (0.1-6.3%)	≥50	NA	NA	0.693027	0.834529	FALSE	ns	Not significant	Wilcoxon rank-sum test	≥50 vs <50
Streptococcus_Stage_clean	NA	2.04474	0.10618	7.65816	7.97754	41	36	87.8049	Streptococcus	Stage_clean	2% (0.1-7.7%)	NA	Early	NA	0.226253	0.540047	FALSE	ns	Not significant	Wilcoxon rank-sum test	Late vs Early
Streptococcus_Stage_clean	NA	0.665612	0.0457021	4.30565	6.99846	91	74	81.3187	Streptococcus	Stage_clean	0.7% (0-4.3%)	NA	Late	NA	0.226253	0.540047	FALSE	ns	Not significant	Wilcoxon rank-sum test	Late vs Early
Streptococcus_Histology_clean	NA	1.02819	0.0406881	5.31276	7.28604	52	43	82.6923	Streptococcus	Histology_clean	1% (0-5.3%)	NA	NA	Type I epithelial / Other	0.708826	0.834529	FALSE	ns	Not significant	Wilcoxon rank-sum test	Type II epithelial vs Type I epithelial / Other
Streptococcus_Histology_clean	NA	1.19543	0.0617423	6.4627	7.31331	80	67	83.75	Streptococcus	Histology_clean	1.2% (0.1-6.5%)	NA	NA	Type II epithelial	0.708826	0.834529	FALSE	ns	Not significant	Wilcoxon rank-sum test	Type II epithelial vs Type I epithelial / Other

## Sheet: Lactobacillus Species Results
Species	Comparison	Effect Size	Prevalence Difference	p-value	FDR p-value	Significance
L. crispatus	White vs Black	>6x	6.4% vs 0%	0.229	0.458	ns
L. crispatus	Early vs Late Stage	5.55x	12.2% vs 2.2%	0.017	0.067	ns
L. crispatus	Type I epithelial / Other vs Type II epithelial	3.85x	9.6% vs 2.5%	0.071	0.284	ns
L. crispatus	<50 vs ‚â•50 years	3.75x	13.6% vs 3.6%	0.062	0.125	ns
L. jensenii	<50 vs ‚â•50 years	3.13x	22.7% vs 7.3%	0.034	0.125	ns
L. iners	Black vs White	2.27x	22.7% vs 10%	0.074	0.295	ns
L. iners	Late vs Early Stage	1.95x	14.3% vs 7.3%	0.282	0.564	ns
L. iners	<50 vs ‚â•50 years	1.67x	18.2% vs 10.9%	0.34	0.454	ns
L. gasseri	Black vs White	1.5x	13.6% vs 9.1%	0.52	0.693	ns
